# Supplementary material for: Simple and rapid low-cost assays to investigate ethylene glycol and diethylene glycol contamination in raw materials and medicinal syrups
Source: Research Square preprint supplement (doi:10.21203/rs.3.rs-6683642/v1), 2025-06-16
Supplement: Supplementary file 1 [file a7a888e97b250280551db46e.docx]

**Supplementary Information for Arman BY, *et al.* Simple and rapid low-cost assays to investigate ethylene glycol and diethylene glycol contamination in raw materials and medicinal syrups (2025).**


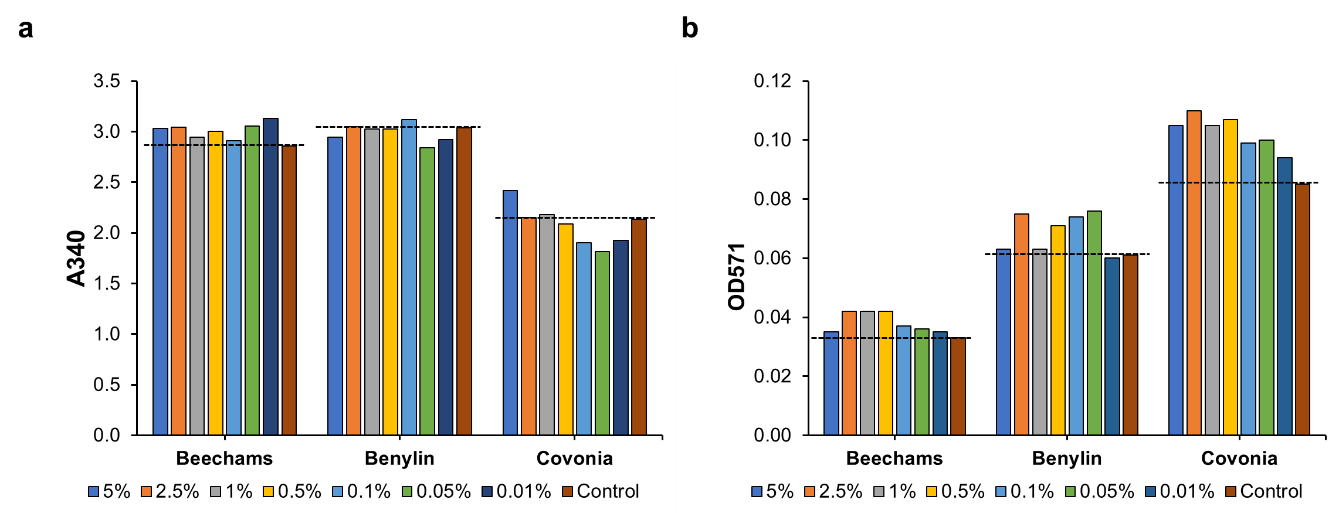


**Supplementary Fig. 1. Enzymatic assay results of three ethanol-containing medicinal syrups (Beechams, Benylin Chesty, and Covonia), spiked with different percentages of EG.** **a** End-point 340 nm absorbance readings of NADH after using alcohol dehydrogenase and aldehyde dehydrogenase. **b** End-point 571 nm absorbance readings after additionally using glycolate oxidase in the glycolic acid assay. The neat syrups without EG spiking (0% EG) were used as controls. Error bars show the standard deviations of two replicates.


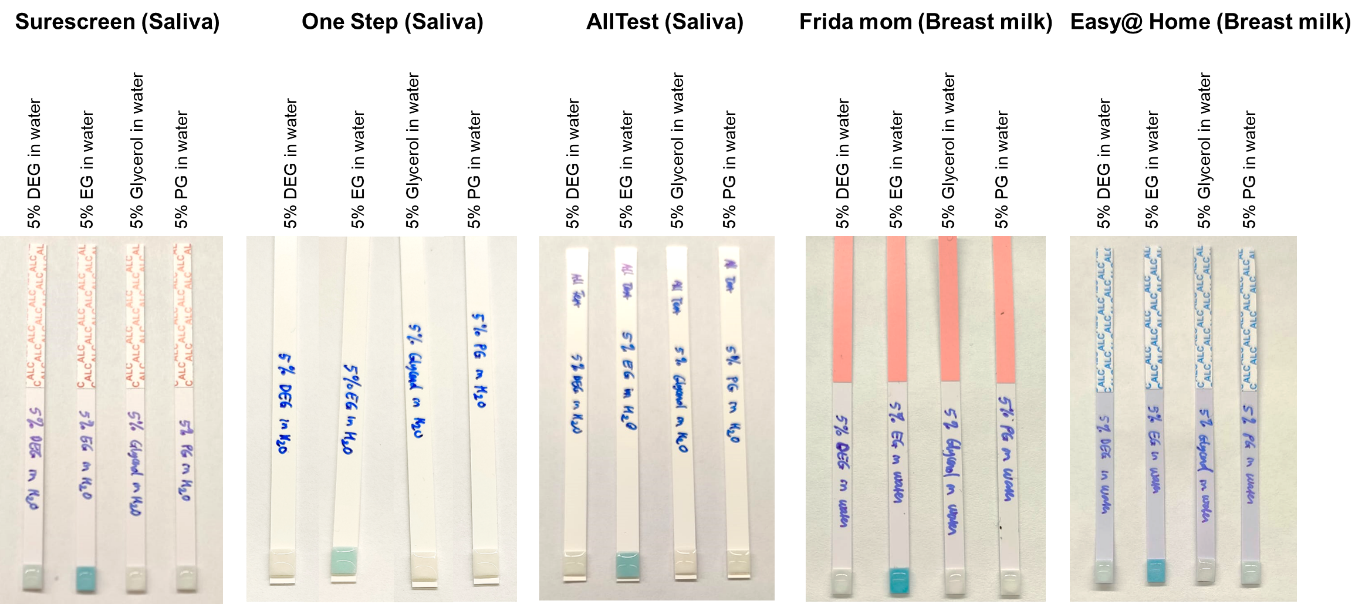


**Supplementary Fig. 2. Successful differentiation of EG from glycerol, PG and DEG using five different brands of alcohol saliva and breast milk test strips.** The best sensitivity for EG was observed using the Surescreen and Frida mom alcohol test strips although all brands could determine EG from the other alcohols with 100% accuracy. A sixth brand (Wondfo One Step Alcohol Saliva Test, Guangzhou, China) was also tested which showed similar results (data not shown).


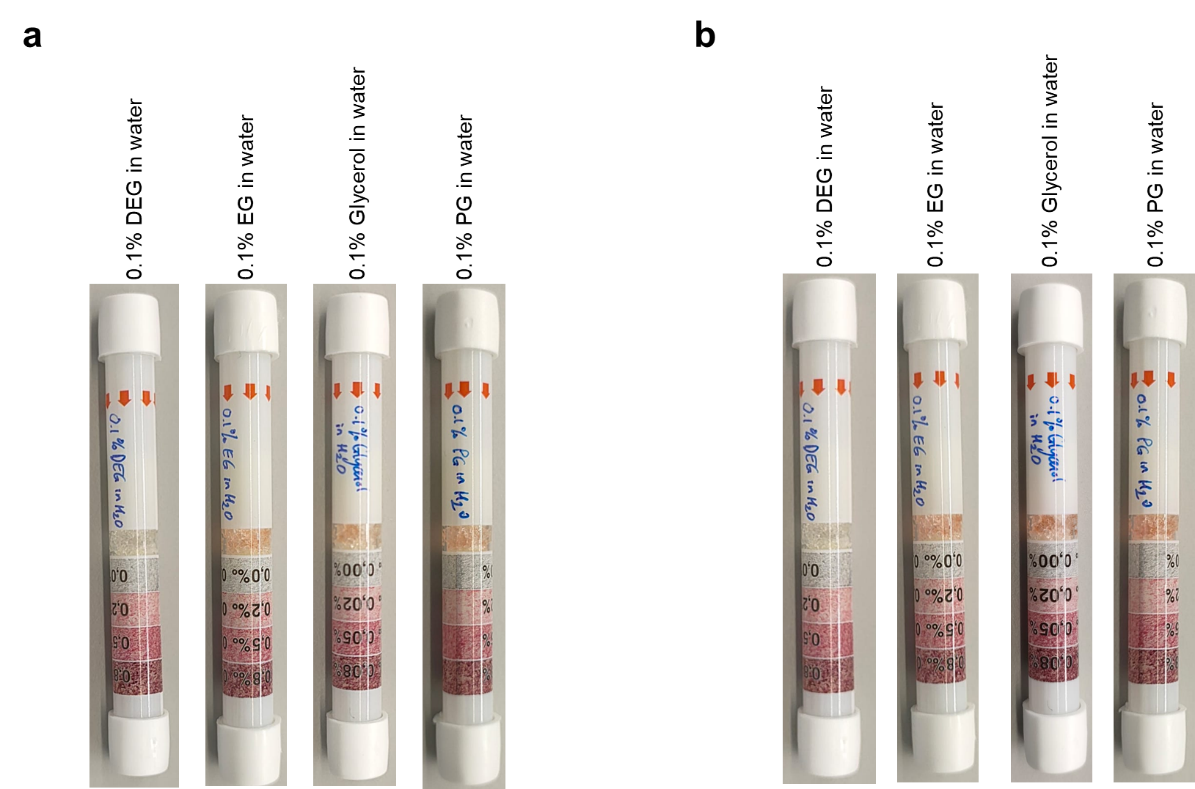


**Supplementary Fig. 3. Disposable breathalysers after testing 0.1% v/v alcohols diluted in water.** **a** Photos taken after 10 seconds and **b** after two minutes.


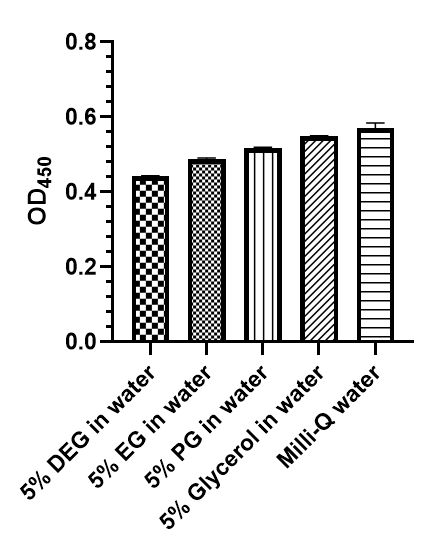


**Supplementary Fig. 4. PEG ELISA results of the alcohol solutions show very weak preferential binding to DEG.** Lower absorbances show greater binding due to this being a competitive ELISA. Error bars show the standard deviations of two replicates.
